# Supplementary material
Source: Springer Nature journal article supplement (https://www.springermedizin.de/resource/supplementary/12955_2010_737_MOESM2_ESM.pdf/9560892)

## Provide meals

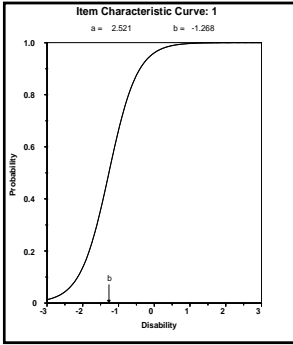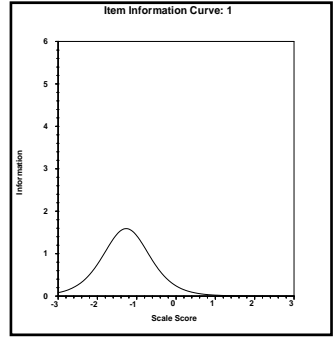

## Take care of personal care needs

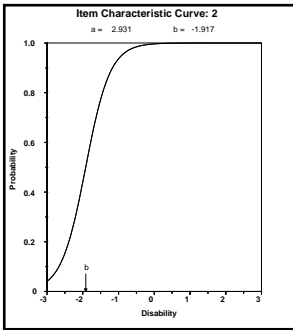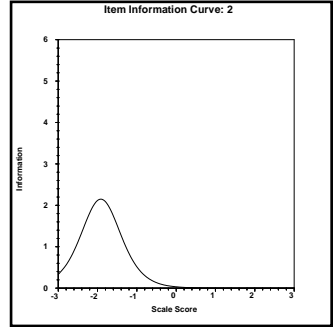

## Take care of local errands

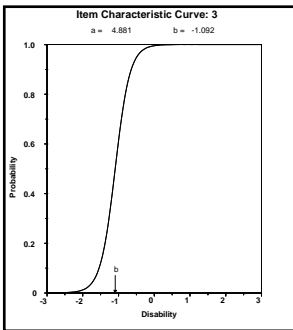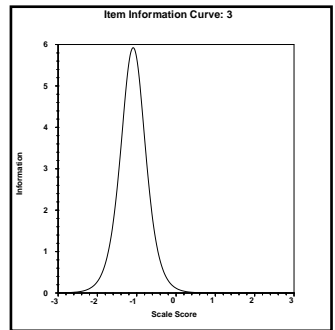

## Take care of household business

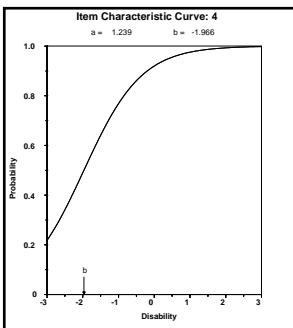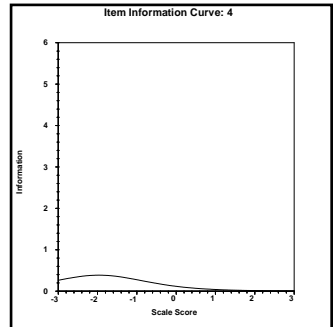

Supplement: MOESM2 [file 9560892]
